# Supplementary material
Source: publisher site journal article supplement (https://www.dovepress.com/article/309374)
Supplement: Supplementary file 1 [file get_supplementary_file.php]

**Supplement**

***Supplementary Table 1*. *Glossary Terms by EPC.***

| **EPC** | **Parameter** | **Definition** | **Agreement** |
| --- | --- | --- | --- |
| Firmness | Elasticity | The ability of the skin to return to its original position. | Strong consensus |
| Tautness/Tightness | The resistance of skin against mechanical force. | Strong consensus |
| Hydration | The water content of the epidermis. | Consensus |
| Skin surface evenness | Pores | A visible topographic feature of skin surfaces that are generally the enlarged openings of pilosebaceous follicles. | Strong consensus |
| Crepiness | Skin that is thin, wrinkled, similar in appearance to crepe paper. | Strong consensus |
| Wrinkles and lines | Lines in the skin caused by mechanical pressure, hydration of the skin, or continuous muscle movement. | Strong consensus |
| Scars | Area of fibrous tissue that replaces normal skin after an injury. | Strong consensus |
| Hair | No visible hair on the face. | N/A* |
| Clarity | Clear skin without black and white heads, pimples, and spots (red or brown rough age spots). | Strong consensus |
| Skin tone evenness | Pigmentation | Determined by distribution of melanosomes within melanocytes. | Strong consensus |
| Erythema | Redness due to increased blood flow. | Strong consensus |
| Coloration/Discoloration | Patients generally don’t want to change their skin color, but rather want it to be more even in tone. | Strong consensus |
| Glow |  | Described by several synonyms, including radiance, luminosity, brightness, vibrancy, and complexion. | Strong consensus |

*This parameter was not voted on.
